# Supplementary material for: An aqueous electrolyte rechargeable Li-ion/polysulfide battery
Source: Royal Society of Chemistry journal article supplement (doi:10.1039/c4ta01308e), 2014-01-01
Supplement: c4ta01308e1.pdf [file c4ta01308e1.pdf]

## SUPPORTING INFORMATIONS

### An aqueous electrolyte rechargeable Li-ion/polysulfide battery

Rezan Demir-Cakan<sup>a,b,\*</sup>, Mathieu Morcrette<sup>b,c</sup>, Jean-Bernard Leriche<sup>b,c</sup>, Jean-Marie Tarascon<sup>b,c,d</sup>

<sup>a</sup> Gebze Institute of Technology, Department of Chemical Engineering, 41400 Gebze, Turkey

<sup>b</sup> Laboratoire de Réactivité et Chimie des Solides, Université de Picardie Jules Verne, CNRS UMR 7314, 33 rue Saint Leu, 80039 Amiens, France

<sup>c</sup> Réseau sur le Stockage Electrochimique de l'Energie (RS2E), FR CNRS 3459, France

<sup>d</sup> Collège de France, 11 Place Marcellin Berthelot, 75005 Paris, France

\* E-mail: [demir-cakan@gyte.edu.tr](mailto:demir-cakan@gyte.edu.tr)

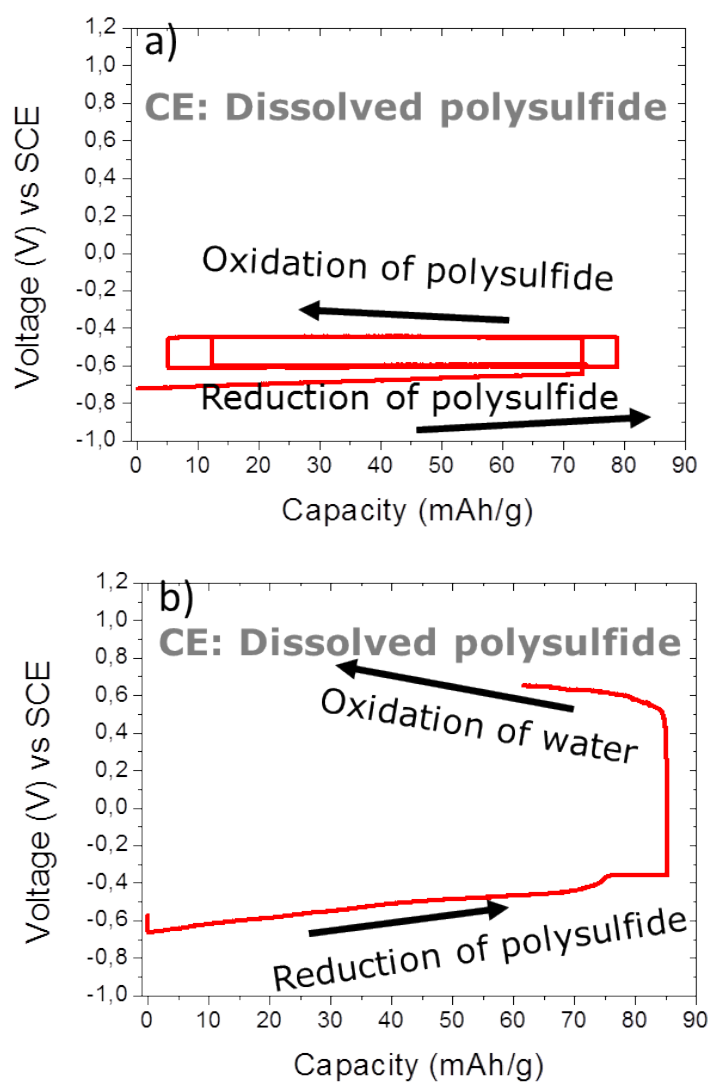

Figure S1: 3-electrode Galvanic cell measuring showing the comparison between the polysulfide cycling behavior a) when excess of polysulfide was used, b) when less polysulfide was used.
